# Supplementary material for: Detours in long-distance migration across the Qinghai-Tibetan Plateau: individual consistency and habitat associations
Source: PeerJ. 2018 Jan 31;6:e4304. doi: 10.7717/peerj.4304 (PMC5797451; doi:10.7717/peerj.4304)
Supplement: Data S1 — Major stopover sites are showed in color. [file peerj-06-4304-s001.xls]

## Sheet: Raw data S1
Migration details of four Pallas's Gulls across Qinghai-Tibetan Plateau during 2006-2009
Autumn migration
Individuals	Year	Departure date	Stopover site 1	Stopover site 2	Stopover site 3	Stopover site 4	Arrival date	Duration	Trans-QTP duration	Shortest distance	Trans-QTP distance in shortest route	Cumulative distance	Trans-QTP distance in observed route	Average speed	Tran-QTP speed	Straightness	Mean altitude	Longitude crossing 29°N	Longitude crossing 35°N
G1	2006	14 Aug	16 Aug-7 Sep	10 Sep-30 Oct			3 Nov	81	79	1811	984	1892	1080	23.358	13.6709	0.957188	2791	94.53	97.2
	2007	14 Aug	20 Aug-12 Sep	14 Sep-18 Oct-?	2 Nov		4 Nov	82	81	1825	979	2068	1458	25.2195	18	0.882495	3238	93.72	97.48
	2008	3 Aug	8 Sep-9 Oct	4 Nov-8 Nov			10 Nov	99	97	1813	972	2126	1567	21.4747	16.1546	0.852775	3448	90.92	97.38
	2009	8 Aug	16-23 Aug	21 Sep-6 Nov			10 Nov	94	92	1809	988	1949	1109	20.734	12.0543	0.928168	2725	95.02	97.39
G2	2006	2 Aug	4 Aug-31 Oct				4 Nov	94	90	1865	975	2037	1417	21.6702	15.7444	0.915562	3011	93.94	95.96
	2007	8 Aug	9-29 Aug	2-7 Sep	11 Sep-31 Oct		14 Nov	98	25	1903	986	4111	1698	41.949	67.92	0.462904	2514	89.82	88.91
	2008	26 Aug	26-28 Aug	2 Sep-24 Oct	？-12 Nov		16 Nov	82	6	1916	942	3978	1831	48.5122	305.167	0.481649	2554	91.06	89.47
G3	2006	9 Aug	10-25 Aug	27-29 Aug	31 Aug-1 Oct	9-28 Oct	3 Dec	116	36	1813	901	4047	1189	34.8879	33.0278	0.447986	2243	98.41	102.65
	2007	16 Aug	?-8 Sep-?				27 Nov	103	30	1998	1013	2618	1301	25.4175	43.3667	0.763178	2271	96.95	100.45
G4	2006	3 Aug	7 Aug-29 Oct				22 Nov	111	24	2029	1245	4261	1957	38.3874	81.5417	0.476179	2507	89.43	88.59
	2007	4 Aug	6 Aug-28 Oct				24 Nov	112	26	2197	1345	4437	2062	39.6161	79.3077	0.495154	2485	90.89	92.08
	2008	5 Aug	7 Aug-?				23 Nov	110	27	2121	1341	4098	1721	37.2545	63.7407	0.51757	2501	88.18	88.13
Spring migration
Individuals	Year	Departure date	Stopover site 1	Stopover site 2	Stopover site 3	Stopover site 4	Arrival date	Duration	Trans-QTP duration	Shortest distance	Trans-QTP distance in shortest route	Cumulative distance	Trans-QTP distance in observed route	Average speed	Tran-QTP speed	Straightness	Mean altitude	Longitude crossing 29°N	Longitude crossing 35°N
G1	2007	5 Mar	10 Mar-31 Mar				1 Apr	27	5	1801	987	3199	1278	118.481	255.6	0.562988	2324	96.12	101.32
	2008	7 Mar	11 Mar	12 Mar-6 Apr			7 Apr	31	4	1863	977	3356	1191	108.258	238.2	0.555125	2109	97.96	102.45
	2009	21 Feb	22-24 Feb	8 Mar-3 Apr			5 Apr	43	11	1830	991	2975	1217	69.186	101.417	0.615126	2240	97.97	103.03
G2	2007	17 Mar	22 Mar-10 May				12 May	56	54	1835	963	2336	1759	41.7143	32.5741	0.785531	3162	92.44	93.72
	2008	18 Mar	22 Mar-24 May				24 May	67	66	1864	980	2171	1574	32.403	23.8485	0.858591	2919	94.3	96.11
	2009	21 Mar	31 Mar-25 Apr				26 Apr	36	30	1870	976	2091	1481	58.0833	49.3667	0.894309	3127	92.44	95.98
G3	2007	30 Mar	4-6 Apr	20 Apr-24 May			29 May	60	17	2161	1362	3618	2683	60.3	157.824	0.597291	3437	87.86	97.11
	2008	26 Mar	4-7 Apr	14-26 Apr			28 Apr	33	8	1855	1003	3617	1874	109.606	234.25	0.512856	2784	90.59	97.37
G4	2007	17 Mar					23 Mar	6	5	2256	1349	2319	1311	386.5	262.2	0.972833	2356	94.79	98.92
	2008	20 Mar	21 Mar	23-26 Mar			28 Mar	8	7	2255	1341	2511	1604	313.875	229.143	0.898049	2730	94.99	97.88
Major stopover sites are showed in color:					Chahanwusu River, Qinghai
					Zhaling & Eling Lakes, Qinghai
					Hang Lake, Tibet
					Donggeicuona Lake, Qinghai
					Keluke Lake, Qinghai
					Yellow River stretch, Yinchuan, Ningxia
					Qinggeda Lake, Changji, Xinjiang
					Hongyashan Reservoir, Minqin, Gansu
